# Supplementary material for: Distinct roles for twoC. elegansanillins in the gonad and early embryo
Source: Oxford University Press journal article supplement (doi:10.1242/dev.01828), 2005-06-01
Supplement: dev01828supptables.pdf [file dev01828supptables.pdf]

**Table S1. Worm strains used in this study**

| Strain number       | Genotype                                                                  |
|---------------------|---------------------------------------------------------------------------|
| N2                  | Ancestral N2 Bristol strain                                               |
| CB228               | <i>unc-61(e228)V</i> .                                                    |
| JJ1473              | <i>unc-119(ed3) III</i> ; <i>zuIs45[nmy-2::NMY-2::GFP + unc-119(+)]</i> . |
| JJ1479              | <i>unc-119(ed3) III</i> ; <i>zuEx77[par-6::PAR-6::GFP + unc-119(+)]</i> . |
| <i>rde-1(ne300)</i> | <i>rde-1(ne300)</i>                                                       |

**Table S2. dsRNAs used in this study**

| Gene number | Name          | Oligo 1                                               | Oligo 2                                       | Template          |
|-------------|---------------|-------------------------------------------------------|-----------------------------------------------|-------------------|
| Y49E10.19   | <i>ani-1</i>  | TAATACGACTCACTATAGGTCAAACCTCAA<br>TGGAGAGGACAA        | AATTAACCCTCACTAAAGGCATTGTGCTT<br>CAAATTCCTCAC | yk488c11          |
| K10B2.5     | <i>ani-2</i>  | TAATACGACTCACTATAGGGAGACCA<br>CCAACGACTCCAAACGTCAGATA | AATTAACCCTCACTAAAGGGTCTCGTCCG<br>TTCTTGTTTCT  | N2 genomic DNA    |
| Y43F8C.14   | <i>ani-3</i>  | TAATACGACTCACTATAGGATTCTGGAGC<br>CCACAAAATG           | AATTAACCCTCACTAAAGGGCGGGAAATT<br>CAAAAATTCA   | yk208a1           |
| F20G4.3     | <i>nmy-2</i>  | TAATACGACTCACTATAGGAATTGAATCT<br>CGGTTGAAGGAA         | AATTAACCCTCACTAAAGGACTGCATTTT<br>ACGCATCTTATG | yk41f5            |
| W09C5.2     | <i>unc-59</i> | AATTAACCCTCACTAAAGGTCGGACTGCA<br>AATAGCTCGT           | TAATACGACTCACTATAGGGCCATTCGT<br>TTCTTCATTG    | yk465c12          |
| Y50E8A.4a   | <i>unc-61</i> | TAATACGACTCACTATAGGAGCTGTGCGAA<br>GCTGGATTTT          | AATTAACCCTCACTAAAGGACGGCTGAAC<br>TCGTCTTGAT   | yk411f2           |
| Yeast gene  | <i>ndc10</i>  | TAATACGACTCACTATAGGCAAATCGCCC<br>TACACTTCGT           | AATTAACCCTCACTAAAGGTCCATTTGGT<br>CCCGTAAAAA   | Yeast genomic DNA |
| Y49E10.19   | <i>ani-1*</i> | AATTAACCCTCACTAAAGGAGCCAAAGG<br>AGACAACTCCA           | TAATACGACTCACTATAGGTGCTGATGTA<br>GGTGCAGGAG   | N2 cDNA           |
| K10B2.5     | <i>ani-2*</i> | AATTAACCCTCACTAAAGGTTGGATGGGA<br>CTCCAAAAAG           | TAATACGACTCACTATAGGCAGCGTGAGG<br>TGTAACGAGA   | yk374e5           |
| Y43F8C.14   | <i>ani-3*</i> | AATTAACCCTCACTAAAGGCTTGAAGCCC<br>AAAAATCGAA           | TAATACGACTCACTATAGGGCTGAGCCAC<br>GAATTC AAGT  | N2 cDNA           |
| Yeast gene  | <i>ctf13</i>  | TAATACGACTCACTATAGGTGTGGAGCTT<br>CCAGGAAAAC           | AATTAACCCTCACTAAAGGCTCGATGTTC<br>CACCATTGA    | Yeast genomic DNA |

dsRNAs were amplified from either N2 genomic DNA, N2 cDNA or gene-specific cDNAs as indicated.

All dsRNAs were 1-3 mg/ml.

\*Second dsRNA used for each anillin protein to ensure specificity.
